# Supplementary material for: Spatial separation of sensitizer and fluorescent emitter for high quantum efficiency in hyperfluorescent organic light-emitting diodes
Source: Royal Society of Chemistry journal article supplement (doi:10.1039/c7tc05283a), 2018-01-01
Supplement: c7tc05283a1.pdf [file c7tc05283a1.pdf]

## **Supporting information**

### **Spatial separation of sensitizer and fluorescent emitter for high quantum efficiency in hyperfluorescent organic light-emitting diodes**

Si Hyun Han, Jun Yeob Lee \*

School of Chemical Engineering, Sungkyunkwan University  
2066, Seobu-ro, Jangan-gu, Seobu-ro, Suwon, Gyeonggi, 16419, Korea  
\*E-mail : [leej17@skku.edu](mailto:leej17@skku.edu)

## List of figures

Figure S1. UV-vis absorption spectra of DMAC-DPS and TBPe, and PL emission spectra of DPEPO and DMAC-DPS.

Figure S2. EQE-luminance data of the DPEPO:DMAC-DPS devices.

Figure S3. Power efficiency-luminance data of the device I, II and III.

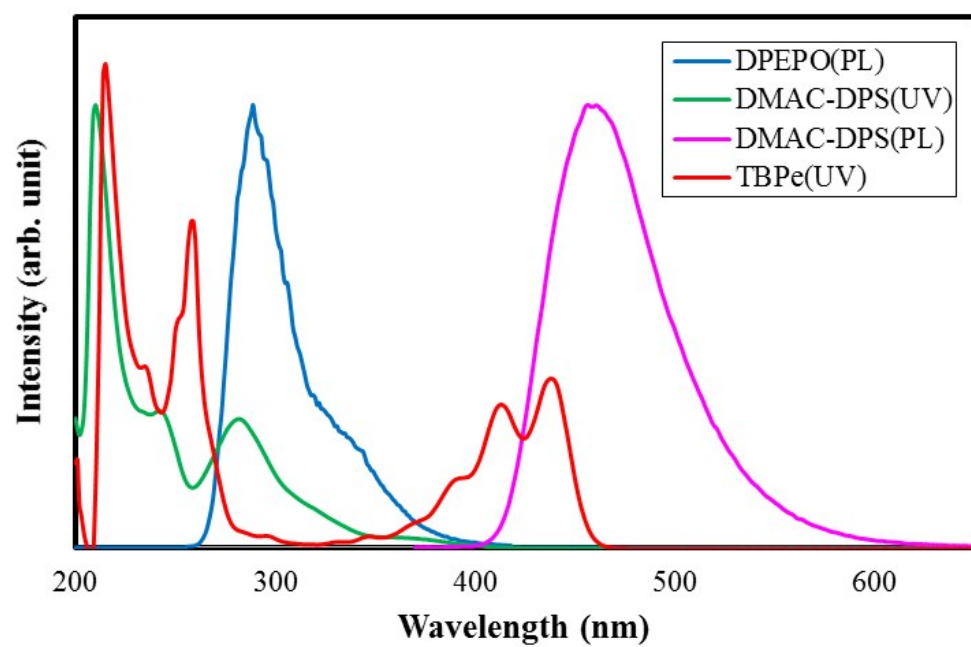

Figure S1

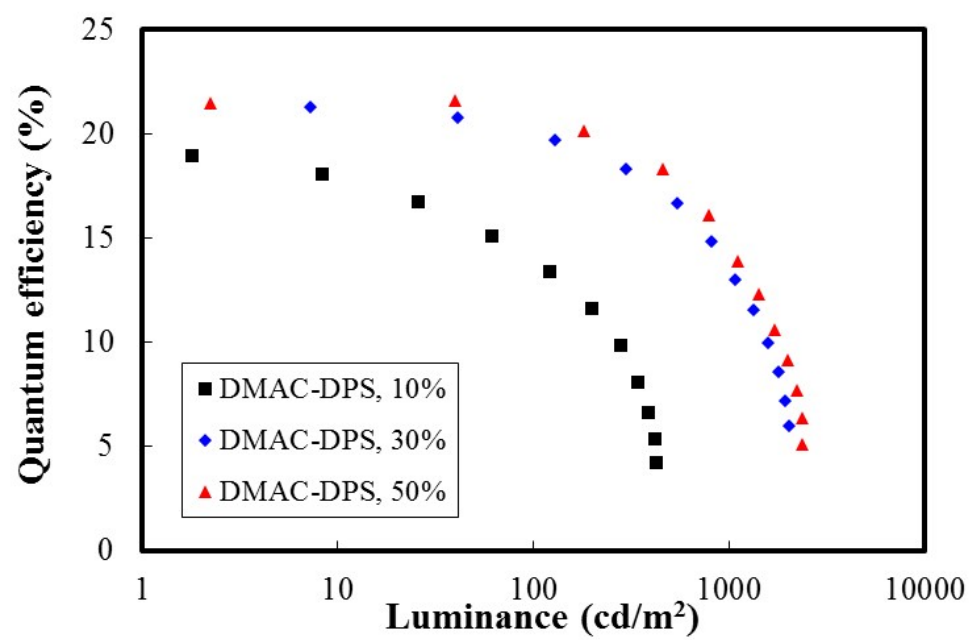

Figure S2

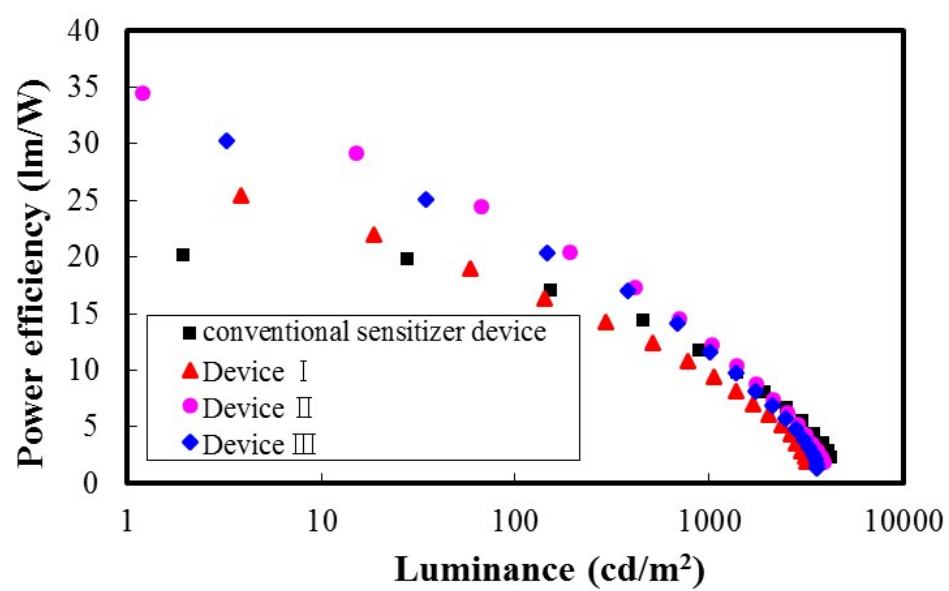

Figure S3
